# Supplementary material for: Inferring Polymorphism-Induced Regulatory Gene Networks Active in Human Lymphocyte Cell Lines by Weighted Linear Mixed Model Analysis of Multiple RNA-Seq Datasets
Source: PubMed Central journal article supplement (PMC3813575; doi:10.1371/journal.pone.0078868), 2013-10-30
Supplement: pone.0078868.s001.pdf [file pone.0078868.s001.pdf]

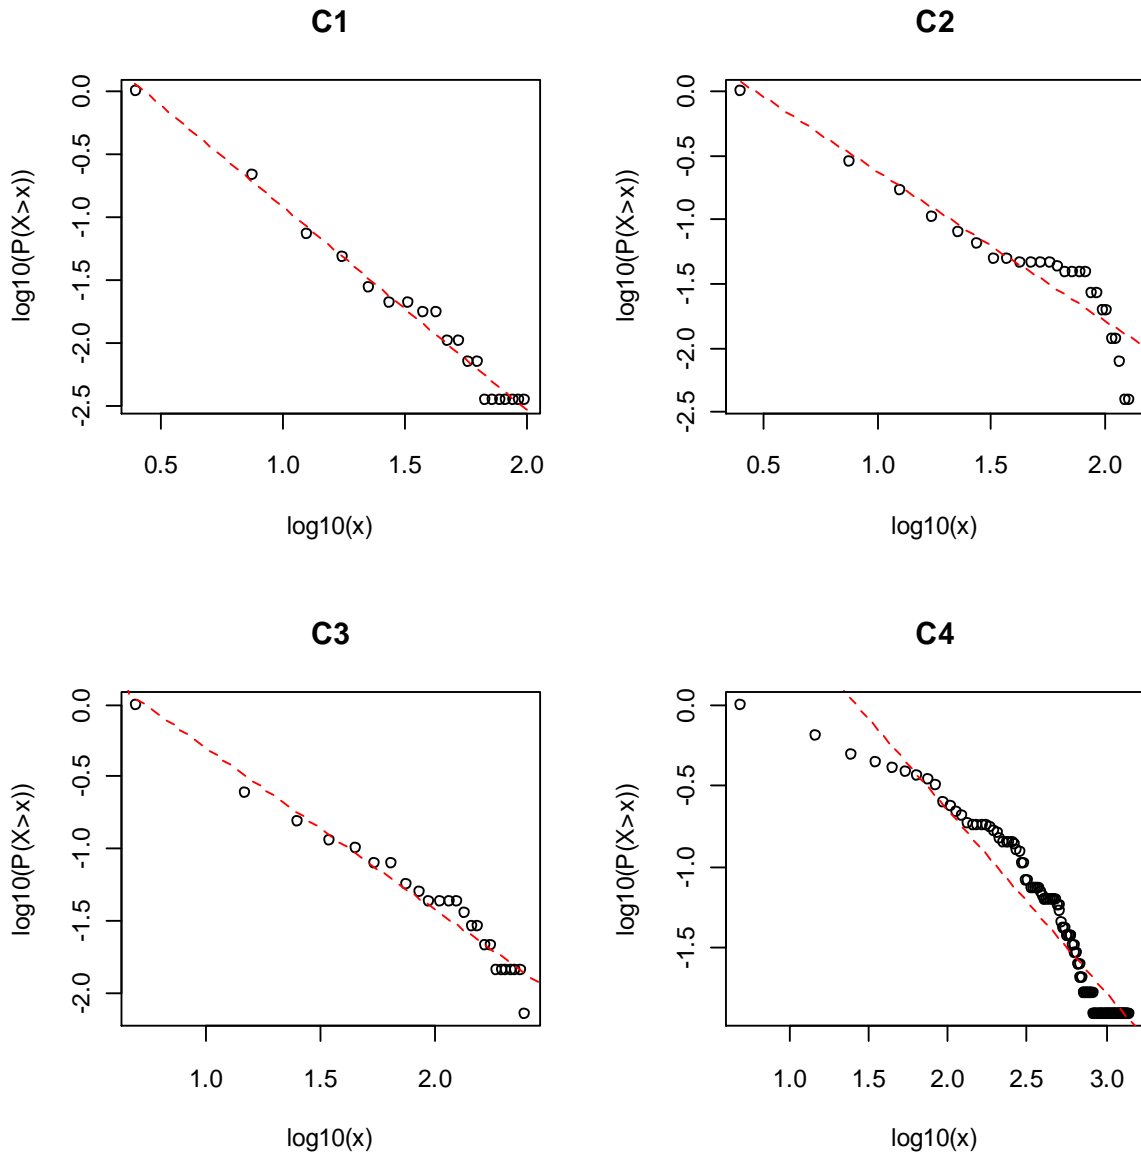

**Figure S1: The double logarithmic charts for the numbers ( $x$ ) of regulated target genes in the identified regulatory networks. C1: cisExpression\_transExpression. C2: cisSplicing\_transExpression. C3: cisExpression\_transSplicing. C4: cisSplicing\_transSplicing.  $P(X>x)$ : the empirical cumulative distribution function. Most data points in C1-3 are adjacent to the (red) straight lines, indicating that the observed target numbers roughly fit a discrete power law distribution  $p(x) \propto x^{-\alpha}$  ( $\alpha>1, x \geq 1$ ). In addressing C1 (C3) data,  $x$  was truncated with 150 (250) as the upper limit to alleviate the leverage effect of the extreme data point.**
